# Supplementary material for: Swine influenza viruses in Northern Vietnam in 2013–2014
Source: PubMed Central journal article supplement (PMC6028489; doi:10.1038/s41426-018-0109-y), 2018-07-02
Supplement: 41426_2018_109_MOESM2_ESM.pdf [file 41426_2018_109_MOESM2_ESM.pdf]

Supplementary Table S2. List of viruses isolated in the collective slaughterhouse in Hanoi in 2013-2014

| Isolation date | Subtype | Strain name                                | Isolation date                                                       | Subtype | Strain name                                |
|----------------|---------|--------------------------------------------|----------------------------------------------------------------------|---------|--------------------------------------------|
| <b>H1N1</b>    |         |                                            | <b>H1N2 (Cont.)</b>                                                  |         |                                            |
| Aug-13         | H1N1    | <u><b>A/swine/Hanoi/411/2013(H1N1)</b></u> | Apr-14                                                               | H1N2    | <u><b>A/swine/Hanoi/643/2014(H1N2)</b></u> |
| Aug-13         | H1N1    | <u><b>A/swine/Hanoi/424/2013(H1N1)</b></u> | May-14                                                               | H1N2    | <u><b>A/swine/Hanoi/815/2014(H1N2)</b></u> |
| Aug-13         | H1N1    | A/swine/Hanoi/443/2013(H1N1)               | May-14                                                               | H1N2    | A/swine/Hanoi/817/2014(H1N2)               |
| Aug-13         | H1N1    | A/swine/Hanoi/445/2013(H1N1)               | May-14                                                               | H1N2    | <u><b>A/swine/Hanoi/819/2014(H1N2)</b></u> |
| Sep-13         | H1N1    | <u><b>A/swine/Hanoi/568/2013(H1N1)</b></u> | May-14                                                               | H1N2    | A/swine/Hanoi/820/2014(H1N2)               |
| Sep-13         | H1N1    | A/swine/Hanoi/571/2013(H1N1)               | May-14                                                               | H1N2    | <u><b>A/swine/Hanoi/822/2014(H1N2)</b></u> |
| Oct-13         | H1N1    | A/swine/Hanoi/834/2013(H1N1)               | May-14                                                               | H1N2    | <u><b>A/swine/Hanoi/824/2014(H1N2)</b></u> |
| Oct-13         | H1N1    | A/swine/Hanoi/836/2013(H1N1)               | May-14                                                               | H1N2    | <u><b>A/swine/Hanoi/825/2014(H1N2)</b></u> |
| Nov-13         | H1N1    | <u><b>A/swine/Hanoi/934/2013(H1N1)</b></u> | May-14                                                               | H1N2    | <u><b>A/swine/Hanoi/826/2014(H1N2)</b></u> |
| Nov-13         | H1N1    | <u><b>A/swine/Hanoi/952/2013(H1N1)</b></u> | May-14                                                               | H1N2    | <u><b>A/swine/Hanoi/830/2014(H1N2)</b></u> |
| Mar-14         | H1N1    | <u><b>A/swine/Hanoi/586/2014(H1N1)</b></u> | May-14                                                               | H1N2    | A/swine/Hanoi/831/2014(H1N2)               |
| Mar-14         | H1N1    | <u><b>A/swine/Hanoi/588/2014(H1N1)</b></u> | May-14                                                               | H1N2    | <u><b>A/swine/Hanoi/833/2014(H1N2)</b></u> |
| May-14         | H1N1    | <u><b>A/swine/Hanoi/788/2014(H1N1)</b></u> | May-14                                                               | H1N2    | <u><b>A/swine/Hanoi/836/2014(H1N2)</b></u> |
| May-14         | H1N1    | <u><b>A/swine/Hanoi/838/2014(H1N1)</b></u> | May-14                                                               | H1N2    | A/swine/Hanoi/839/2014(H1N2)               |
| May-14         | H1N1    | <u><b>A/swine/Hanoi/872/2014(H1N1)</b></u> | May-14                                                               | H1N2    | <u><b>A/swine/Hanoi/888/2014(H1N2)</b></u> |
| May-14         | H1N1    | <u><b>A/swine/Hanoi/894/2014(H1N1)</b></u> | May-14                                                               | H1N2    | <u><b>A/swine/Hanoi/896/2014(H1N2)</b></u> |
| <b>H1N2</b>    |         |                                            | May-14                                                               | H1N2    | A/swine/Hanoi/897/2014(H1N2)               |
| Dec-13         | H1N2    | <u><b>A/swine/Hanoi/054/2013(H1N2)</b></u> | May-14                                                               | H1N2    | A/swine/Hanoi/898/2014(H1N2)               |
| Jan-14         | H1N2    | <u><b>A/swine/Hanoi/304/2014(H1N2)</b></u> | May-14                                                               | H1N2    | <u><b>A/swine/Hanoi/900/2014(H1N2)</b></u> |
| Mar-14         | H1N2    | <u><b>A/swine/Hanoi/532/2014(H1N2)</b></u> | May-14                                                               | H1N2    | <u><b>A/swine/Hanoi/907/2014(H1N2)</b></u> |
| Mar-14         | H1N2    | A/swine/Hanoi/534/2014(H1N2)               | May-14                                                               | H1N2    | A/swine/Hanoi/908/2014(H1N2)               |
| Mar-14         | H1N2    | A/swine/Hanoi/541/2014(H1N2)               | May-14                                                               | H1N2    | A/swine/Hanoi/910/2014(H1N2)               |
| Mar-14         | H1N2    | <u><b>A/swine/Hanoi/542/2014(H1N2)</b></u> | May-14                                                               | H1N2    | A/swine/Hanoi/911/2014(H1N2)               |
| Mar-14         | H1N2    | A/swine/Hanoi/544/2014(H1N2)               | May-14                                                               | H1N2    | A/swine/Hanoi/912/2014(H1N2)               |
| Mar-14         | H1N2    | <u><b>A/swine/Hanoi/546/2014(H1N2)</b></u> | <b>Legend:</b>                                                       |         |                                            |
| Mar-14         | H1N2    | <u><b>A/swine/Hanoi/547/2014(H1N2)</b></u> | <u><b>A/swine:</b></u> Full length sequencing for all eight segments |         |                                            |
| Mar-14         | H1N2    | A/swine/Hanoi/554/2014(H1N2)               | <u><b>A/swine:</b></u> Partial sequencing only for internal genes    |         |                                            |
| Mar-14         | H1N2    | <u><b>A/swine/Hanoi/556/2014(H1N2)</b></u> |                                                                      |         |                                            |

Supplementary Table S2. List of viruses isolated in the collective slaughterhouse in Hanoi in 2013-2014 (Continued)

| Isolation date                   | Subtype      | Strain name                                |
|----------------------------------|--------------|--------------------------------------------|
| <b>H3N2 related to Korean TR</b> |              |                                            |
| Aug-13                           | H3N2         | <u>A/swine/Hanoi/415/2013(H3N2)</u>        |
| Aug-13                           | H3N2         | <u>A/swine/Hanoi/417/2013(H3N2)</u>        |
| Aug-13                           | H3N2         | <u>A/swine/Hanoi/420/2013(H3N2)</u>        |
| Aug-13                           | H3N2         | <u>A/swine/Hanoi/421/2013(H3N2)</u>        |
| Aug-13                           | H3N2         | <u>A/swine/Hanoi/422/2013(H3N2)</u>        |
| Aug-13                           | H3N2         | <u>A/swine/Hanoi/435/2013(H3N2)</u>        |
| Aug-13                           | H3N2         | <u>A/swine/Hanoi/437/2013(H3N2)</u>        |
| Aug-13                           | H3N2         | <u>A/swine/Hanoi/447/2013(H3N2)</u>        |
| Aug-13                           | H3N2         | <u>A/swine/Hanoi/454/2013(H3N2)</u>        |
| Dec-13                           | H3N2         | <u><b>A/swine/Hanoi/027/2013(H3N2)</b></u> |
| Jan-14                           | H3N2         | <u><b>A/swine/Hanoi/181/2014(H3N2)</b></u> |
| Jan-14                           | H3N2         | <u>A/swine/Hanoi/190/2014(H3N2)</u>        |
| Jan-14                           | H3N2         | <u><b>A/swine/Hanoi/192/2014(H3N2)</b></u> |
| Feb-14                           | H3N2         | <u><b>A/swine/Hanoi/351/2014(H3N2)</b></u> |
| Feb-14                           | H3N2         | <u><b>A/swine/Hanoi/353/2014(H3N2)</b></u> |
| Feb-14                           | H3N2         | <u>A/swine/Hanoi/355/2014(H3N2)</u>        |
| Feb-14                           | H3N2         | <u><b>A/swine/Hanoi/359/2014(H3N2)</b></u> |
| Feb-14                           | H3N2         | <u>A/swine/Hanoi/361/2014(H3N2)</u>        |
| Feb-14                           | H3N2         | <u><b>A/swine/Hanoi/405/2014(H3N2)</b></u> |
| Feb-14                           | H3N2         | <u><b>A/swine/Hanoi/434/2014(H3N2)</b></u> |
| Feb-14                           | H3N2         | <u><b>A/swine/Hanoi/442/2014(H3N2)</b></u> |
| Feb-14                           | H3N2         | <u>A/swine/Hanoi/444/2014(H3N2)</u>        |
| Apr-14                           | H3N2         | <u><b>A/swine/Hanoi/647/2014(H3N2)</b></u> |
| Apr-14                           | H3N2         | <u>A/swine/Hanoi/649/2014(H3N2)</u>        |
| Apr-14                           | H3N2         | <u><b>A/swine/Hanoi/655/2014(H3N2)</b></u> |
| <b>H3N2 Binh Duong-like</b>      |              |                                            |
| Mar-14                           | H3N2 BD-like | <u><b>A/swine/Hanoi/601/2014(H3N2)</b></u> |
