# Supplementary material for: Swine influenza viruses in Northern Vietnam in 2013–2014
Source: PubMed Central journal article supplement (PMC6028489; doi:10.1038/s41426-018-0109-y), 2018-07-02
Supplement: 41426_2018_109_MOESM3_ESM.pdf [file 41426_2018_109_MOESM3_ESM.pdf]

Supplementary Table S3. Number of influenza viruses isolated and isolation rate per month at the collective slaughterhouse

| Date of sampling | Number of nasal swab samples | Number of isolates | Isolation rate % | Subtypes            | Genotypes* |
|------------------|------------------------------|--------------------|------------------|---------------------|------------|
| 07-May-13        | 121                          | 0                  | 0                | -                   | -          |
| 11-Jun-13        | 130                          | 0                  | 0                | -                   | -          |
| 02-Jul-13        | 150                          | 0                  | 0                | -                   | -          |
| 06-Aug-13        | 150                          | 13                 | 8.7              | H1N1, H3N2-K        | 1, 14      |
| 04-Sep-13        | 150                          | 2                  | 1.3              | H1N1                | 1          |
| 02-Oct-13        | 150                          | 2                  | 1.3              | H1N1                | -          |
| 06-Nov-13        | 150                          | 2                  | 1.3              | H1N1                | 1          |
| 04-Dec-13        | 150                          | 2                  | 1.3              | H1N2, H3N2-K        | 8, 14      |
| 17-Jan-14        | 150                          | 4                  | 2.7              | H1N2, H3N2-K        | 8, 16      |
| 13-Feb-14        | 150                          | 9                  | 6.0              | H3N2-K              | 14, 15     |
| 19-Mar-14        | 150                          | 12                 | 8.0              | H1N1, H1N2, H3N2-BD | 1, 8, 12   |
| 02-Apr-14        | 150                          | 4                  | 2.7              | H1N2, H3N2-K        | 8, 16      |
| 08-May-14        | 150                          | 27                 | 18               | H1N1, H1N2          | 1, 8       |
| 11-Jun-14        | 150                          | 0                  | 0                | -                   | -          |
| <b>Total</b>     | <b>2,051</b>                 | <b>77</b>          | <b>3.8</b>       |                     |            |

\*Genotypes of the sequenced viruses

H3N2-K=Korean-like H3N2 ; H3N2-BD=Binh Duong-like H3N2
