# Supplementary material for: Swine influenza viruses in Northern Vietnam in 2013–2014
Source: PubMed Central journal article supplement (PMC6028489; doi:10.1038/s41426-018-0109-y), 2018-07-02
Supplement: 41426_2018_109_MOESM4_ESM.pdf [file 41426_2018_109_MOESM4_ESM.pdf]

Supplementary Figure S4. Phylogenetic tree for the full length PB2 of viruses isolated in a slaughterhouse in Vietnam in 2013-2014

The trees were constructed with MEGA 6.06. Bootstrap values greater or equal to 70 are shown. GenBank accession numbers of retrieved sequences are indicated.

Underlined: Viruses from our study. **Bold**: Viruses from Vietnam from other studies.

# PB2

Pdm09 = 2009 H1N1

pandemic

TR = Triple Reassortant

EA = Eurasian Avian

CS = Classical Swine

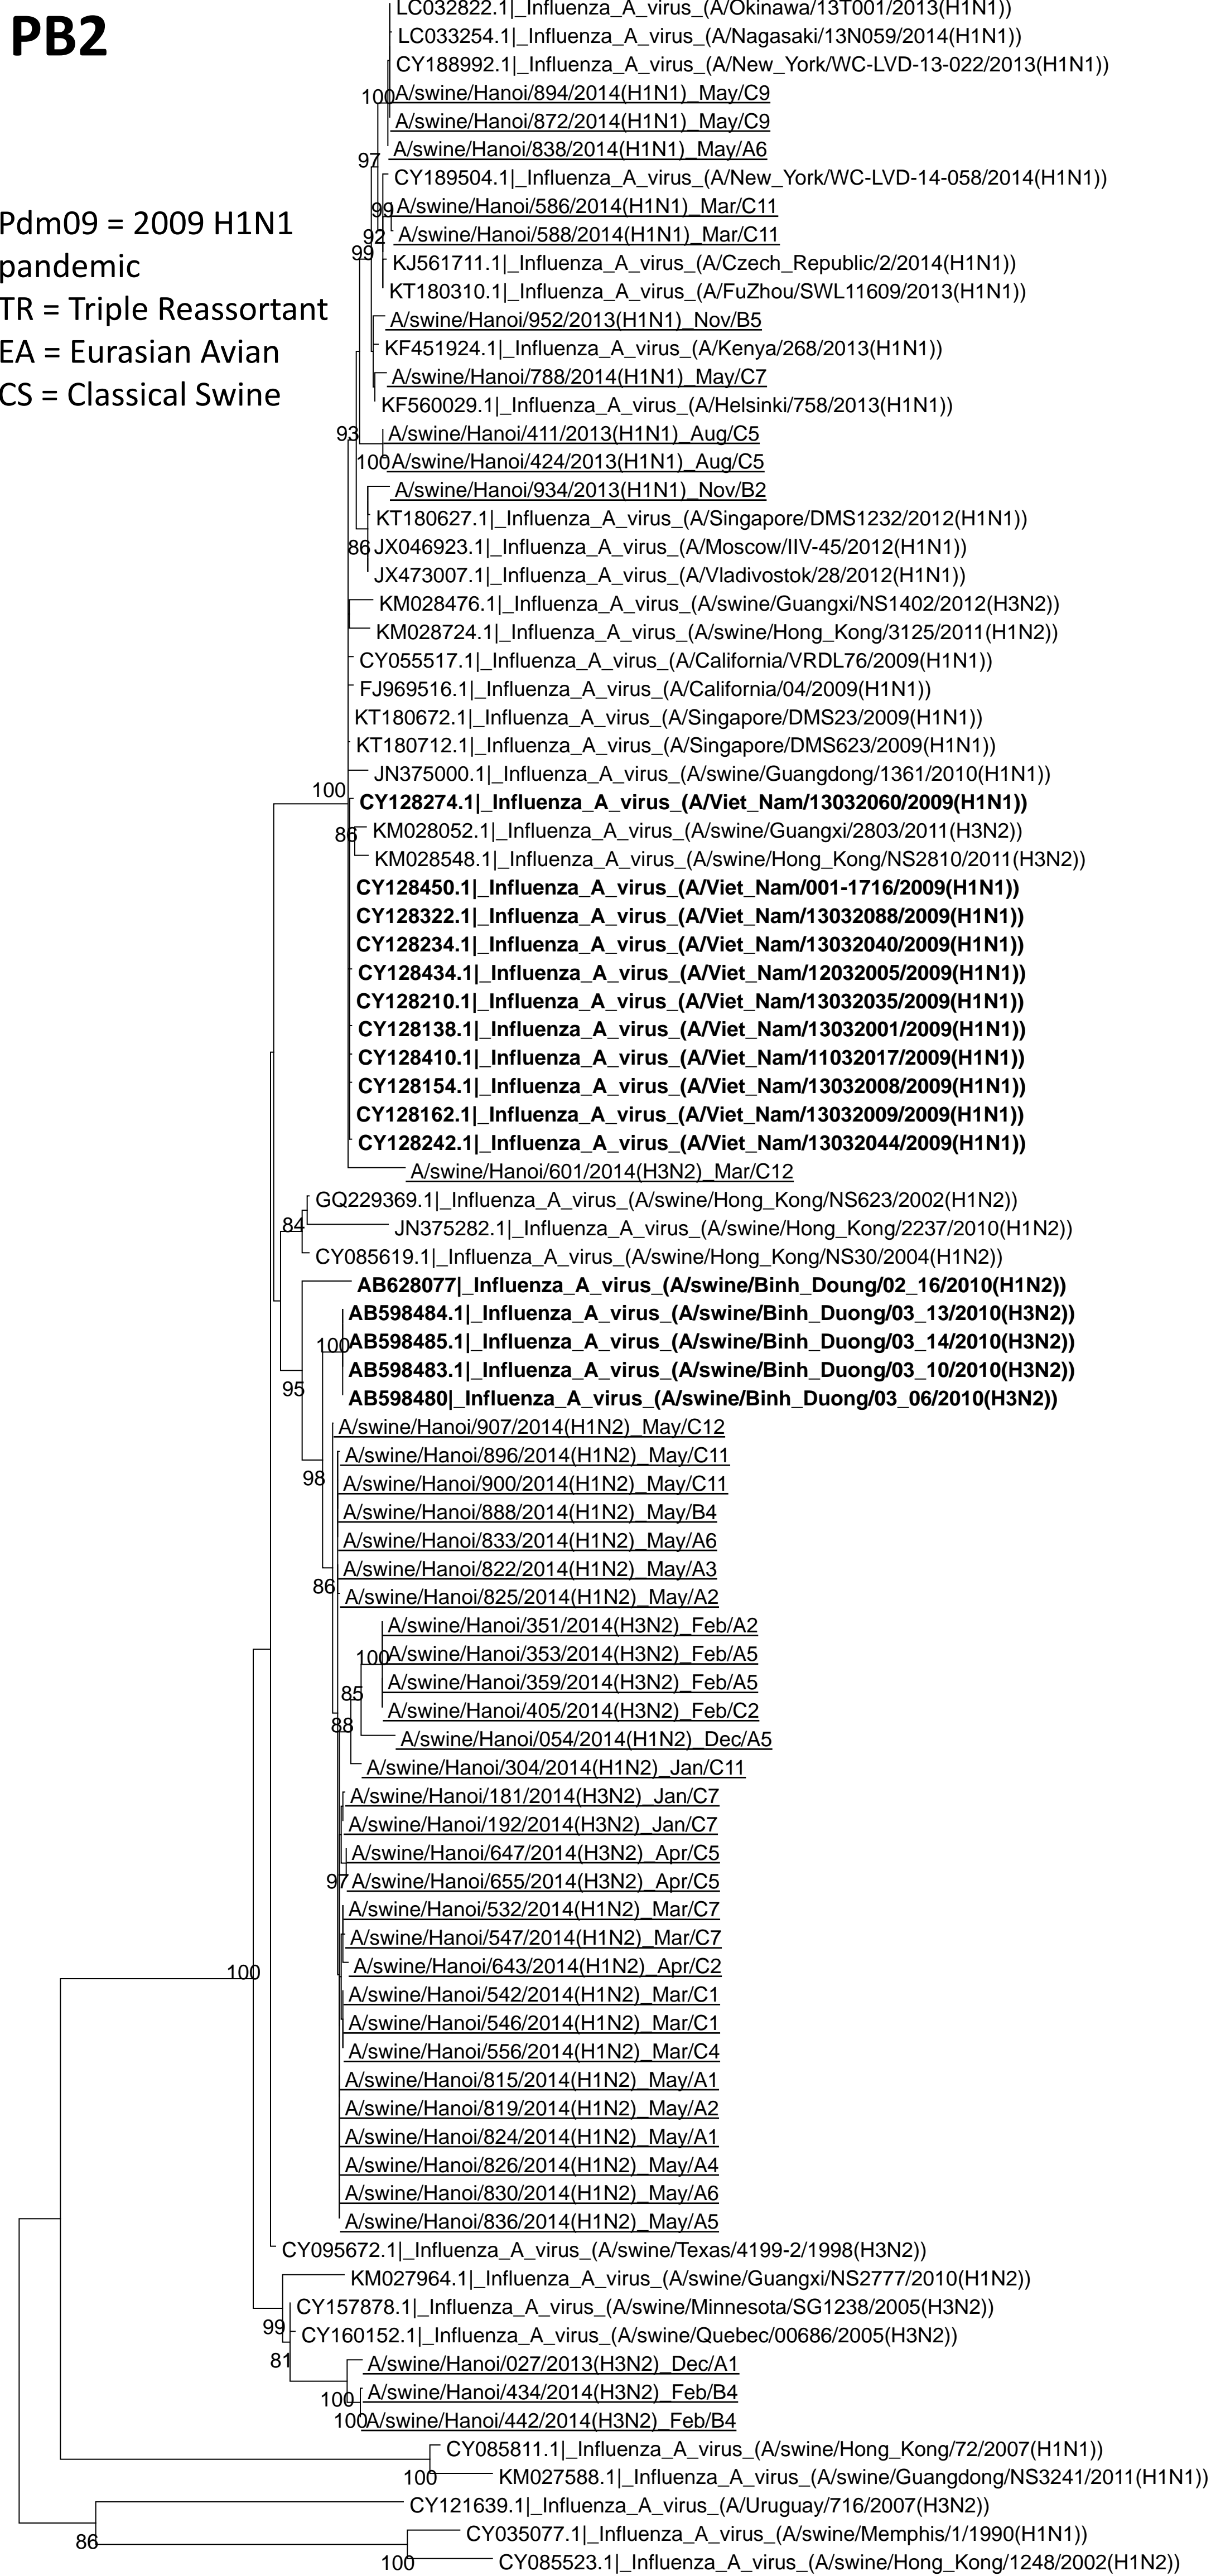

Pdm09

TR

EA  
Human  
CS

0.02
