# Supplementary material for: Swine influenza viruses in Northern Vietnam in 2013–2014
Source: PubMed Central journal article supplement (PMC6028489; doi:10.1038/s41426-018-0109-y), 2018-07-02
Supplement: 41426_2018_109_MOESM5_ESM.pdf [file 41426_2018_109_MOESM5_ESM.pdf]

Supplementary Figure S5. Phylogenetic tree for the full length NP of viruses isolated in a slaughterhouse in Vietnam in 2013-2014

The trees were constructed with MEGA 6.06. Bootstrap values greater or equal to 70 are shown. GenBank accession numbers of retrieved sequences are indicated.

Underlined: Viruses from our study. **Bold**: Viruses from Vietnam from other studies.

# NP

Pdm09 = 2009 H1N1  
pandemic  
TR = Triple Reassortant  
EA = Eurasian Avian  
CS = Classical Swine

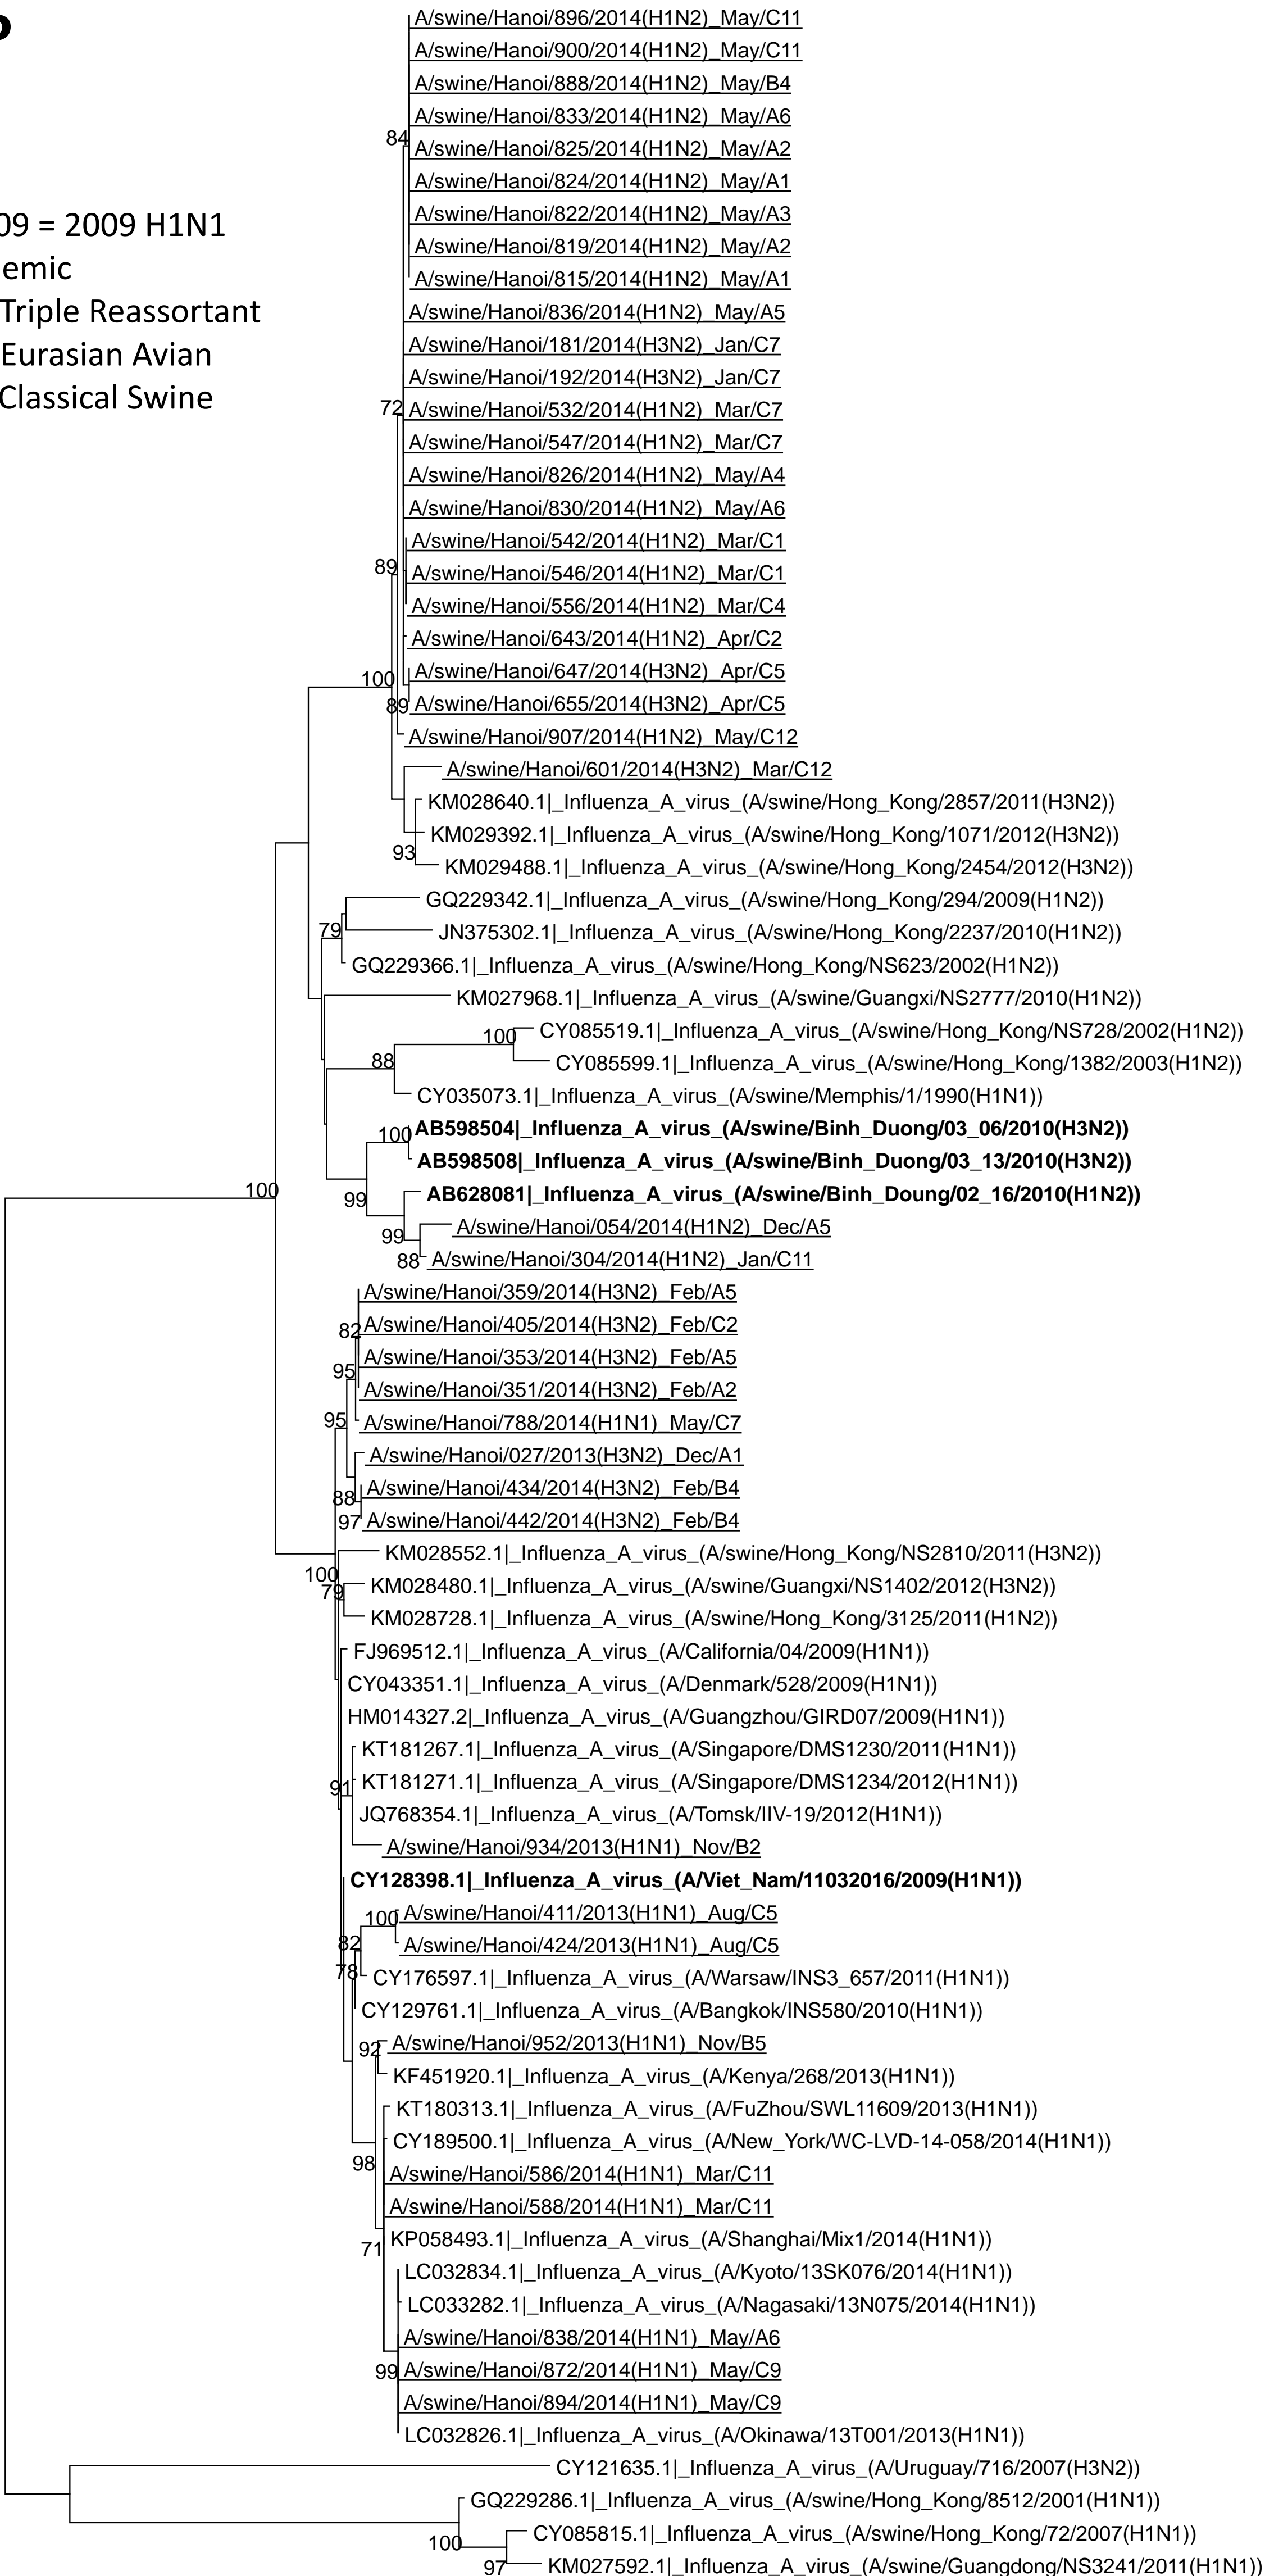

TR

CS

TR

Pdm09

Human

EA

0.02
