# Supplementary material for: Swine influenza viruses in Northern Vietnam in 2013–2014
Source: PubMed Central journal article supplement (PMC6028489; doi:10.1038/s41426-018-0109-y), 2018-07-02
Supplement: 41426_2018_109_MOESM7_ESM.pdf [file 41426_2018_109_MOESM7_ESM.pdf]

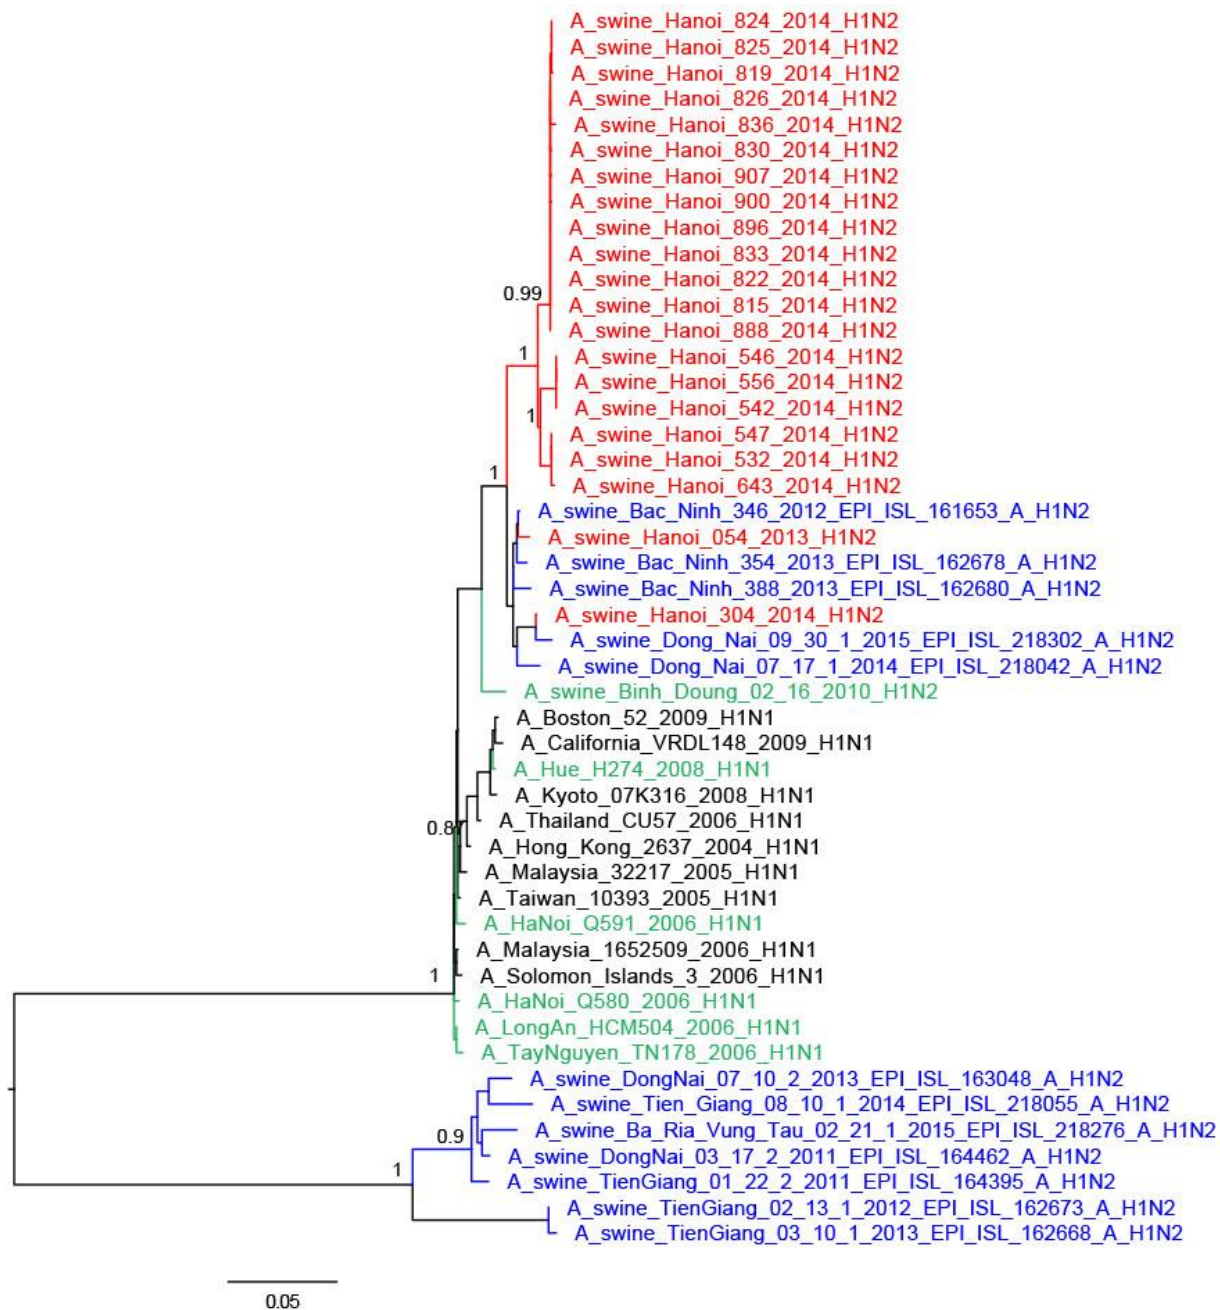

**Supplementary Figure S7. Phylogenetic tree for the full length HA of H1N2 viruses isolated in a slaughterhouse in Vietnam in 2013-2014**

Trees were constructed with PhyML. Branch support aLRT statistics were shown at major nodes with values larger or equal to 0.8. GenBank accession numbers of retrieved sequences are indicated. Red: sequences from our study; Blue: sequences from Takemae et al. (Ref. 28); Green: viruses from Vietnam from other studies.
