# Supplementary material for: Swine influenza viruses in Northern Vietnam in 2013–2014
Source: PubMed Central journal article supplement (PMC6028489; doi:10.1038/s41426-018-0109-y), 2018-07-02
Supplement: 41426_2018_109_MOESM8_ESM.pdf [file 41426_2018_109_MOESM8_ESM.pdf]

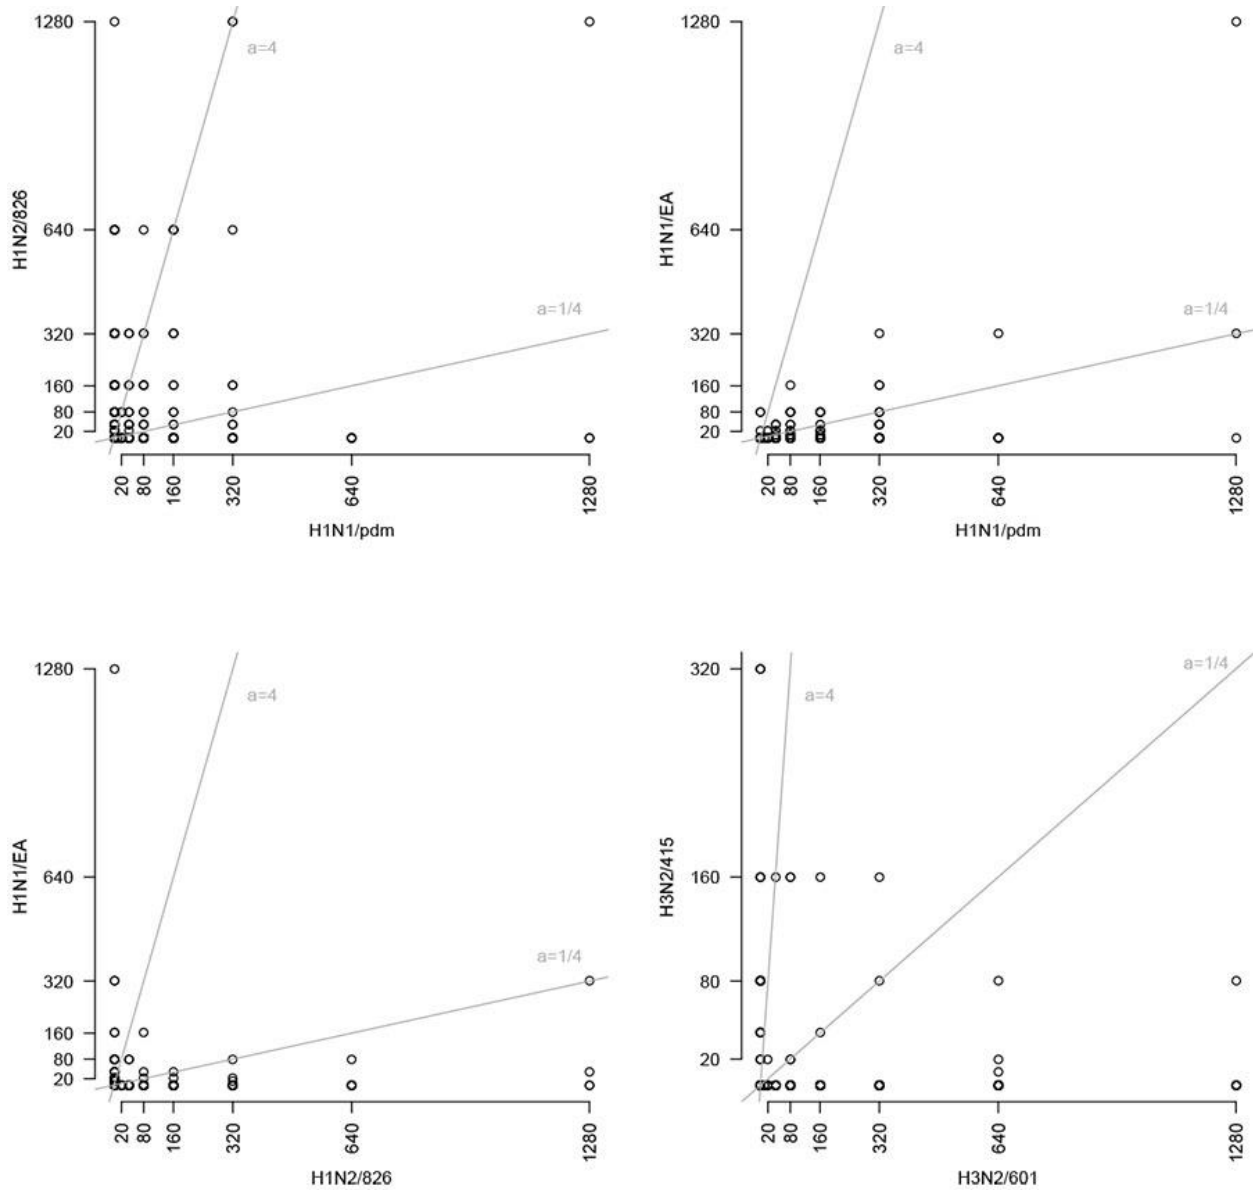

**Supplementary Figure S8. Potential serological cross-reactions by haemagglutination inhibition test for viruses of same subtype**

All HI positive sera are included. Sera with titers located below the line of slope  $a=1/4$  are considered positive for the strain which titers are represented in the X axis and cross-reactive for the strain which titers are represented in the Y axis, and inversely for sera located above the line of slope  $a=4$ . Sera located in between the two lines reacted to both strains and a main strain cannot be determined (HI “undetermined”).
